# Supplementary material
Source: PubMed Central journal article supplement (PMC4567629)
Supplement: IAI.00510-15_zii999091420so1.pdf [file IAI.00510-15_zii999091420so1.pdf]

## Supplemental

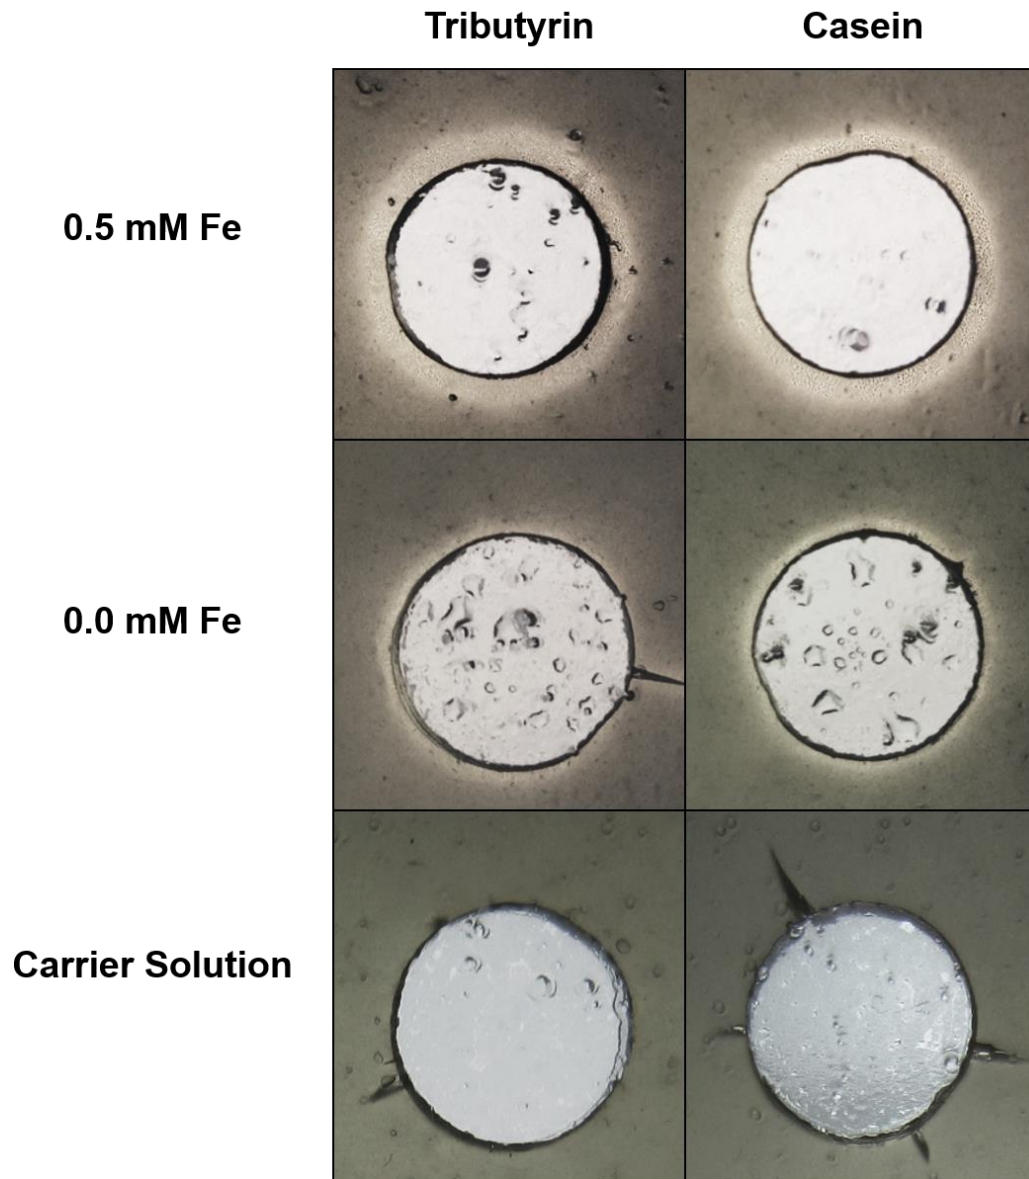

**Supplemental Figure 1: Tributyrin and Casein Degradation Assay Plates.** Wells in tributyrin or casein agar plates assessed for areas of clearing after exposure to supernatant liquids from 0.5 mM iron treated biofilms, untreated biofilms or carrier solution. Halos around the wells denote substrate clearing. The diameter of each well is 10 mm, and depth is 2 mm.
